# Supplementary material
Source: MDPI journal article supplement (https://www.mdpi.com/2076-3417/11/24/11921)
Supplement: s1 [file s1 › applsci-1490362-supplementary.pdf]

## Supplementary materials

Effects of virgin microplastics on growth, intestinal morphology and microbiota in largemouth bass (*Micropterus salmoides*)

Chaonan Zhang<sup>1,2</sup>, Qiujie Wang<sup>2</sup>, Shaodan Wang<sup>2</sup>, Zhengkun Pan<sup>2</sup>, Di Sun<sup>1,2</sup>, Yanbo Cheng<sup>1</sup>, Jixing Zou<sup>2,3\*</sup>, Guohuan Xu<sup>1\*\*</sup>

<sup>1</sup>State Key Laboratory of Applied Microbiology Southern China, Guangdong Provincial Key Laboratory of Microbial Culture Collection and Application, Institute of Microbiology, Guangdong Academy of Sciences, Guangzhou 510070, China

<sup>2</sup>Joint Laboratory of Guangdong Province and Hong Kong Region on Marine Bioresource Conservation and Exploitation, College of Marine Sciences, South China Agricultural University, Guangzhou 510642, China

<sup>3</sup>Guangdong Laboratory for Lingnan Modern Agriculture, South China Agricultural University, Guangzhou 510642, China

Correspondence authors:

\* zoujixing@scau.edu.cn (J. Zou);

\*\* xghfish@163.com (G. Xu).

**Supplementary materials caption:**

**Table S1.** Weight and length information of largemouth bass before and after the experiment

**Table S2.** Alpha diversity of intestinal microbiota

**Figure S1.** Identification of materials

**Figure S2.** The process of making fodder contained MPs

**Figure S3.** Villi length of largemouth bass among each group after the trial

**Figure S4.** Rarefaction curves

**Supporting Text 1.** Specific steps of PCR reactions

**Supporting Text 2:** Processing of raw fastq files

**Supporting Text 3:** Intestinal microbial analyses

**Table S1. Weight and length information of largemouth bass before and after the experiment**

|                | <b>Initial weight<br/>(g)</b> | <b>Initial length<br/>(cm)</b> | <b>Final weight<br/>(g)</b> | <b>Final length<br/>(cm)</b> |
|----------------|-------------------------------|--------------------------------|-----------------------------|------------------------------|
| <b>Group A</b> | 4.11±0.48                     | 5.53±0.40                      | 10.79±1.08                  | 8.17±0.25                    |
| <b>Group B</b> | 3.38±0.08                     | 5.65±0.15                      | 11.27±2.08                  | 8.45±0.38                    |
| <b>Group C</b> | 4.46±0.28                     | 5.73±0.20                      | 11.09±0.40                  | 8.28±0.14                    |
| <b>Group D</b> | 3.73±0.14                     | 5.65±0.13                      | 10.85±0.41                  | 8.21±0.17                    |

**Table S2. Alpha diversity of intestinal microbiota.**

| <b>Sample</b>  | <b>Shannon</b> | <b>Simpson</b> | <b>Ace</b>    | <b>Chao</b>   | <b>Coverage</b> |
|----------------|----------------|----------------|---------------|---------------|-----------------|
| <b>Group A</b> | 2.73±0.93      | 0.21±0.15      | 546.59±136.88 | 540.57±138.96 | 1               |
| <b>Group B</b> | 2.80±1.26      | 0.24±0.15      | 573.81±218.04 | 569.23±230.23 | 1               |
| <b>Group C</b> | 1.08±0.38      | 0.24±0.19      | 555.72±50.92  | 554.63±51.25  | 1               |
| <b>Group D</b> | 1.63±0.18      | 0.35±0.08      | 380.98±134.89 | 367.32±140.84 | 1               |

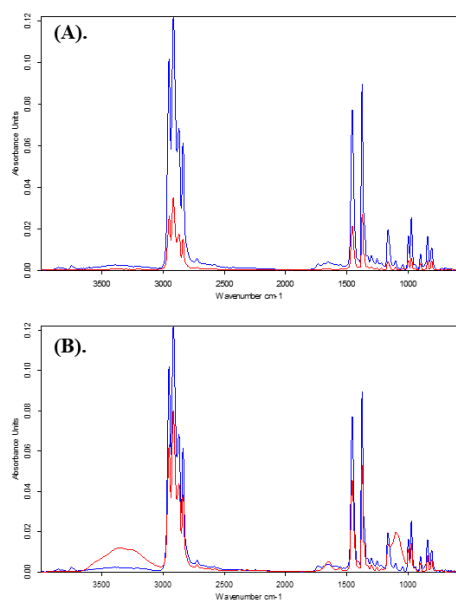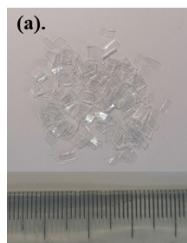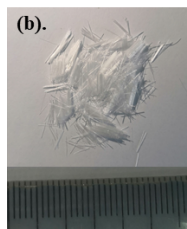

Compound Name: Polypropylene  
Molecular Formula:  $C_{22}H_{42}O_3$   
Molecular Weight: 354.56708  
CAS Registry Number: 9003-07-0

**Figure S1. Identification of materials**

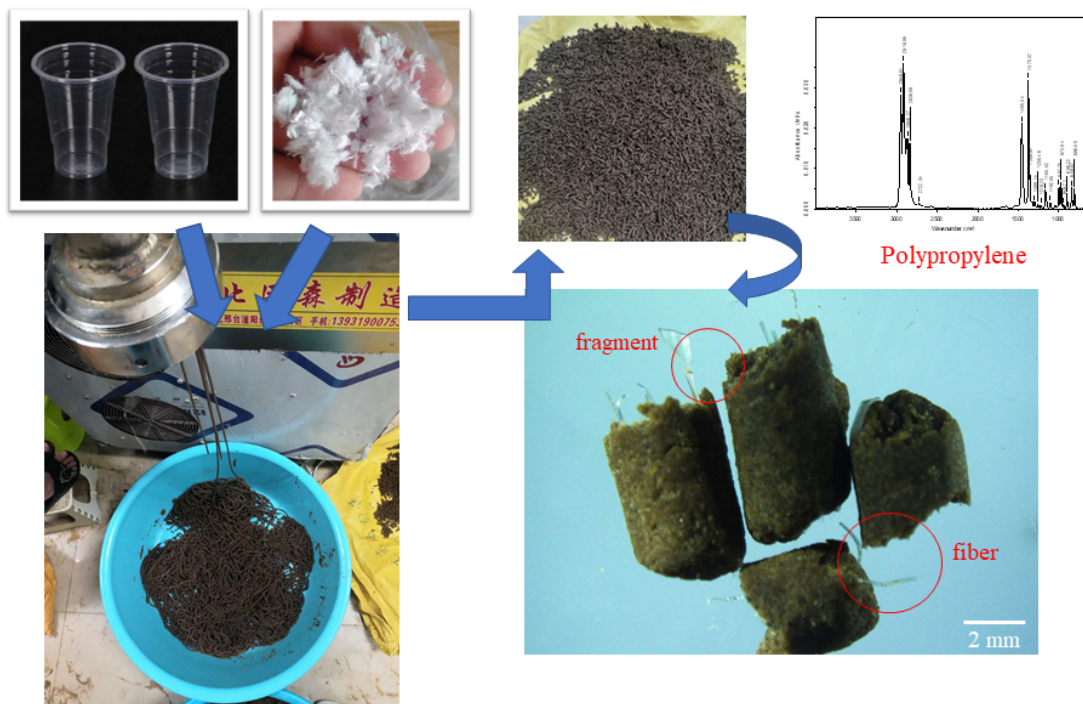

**Supplementary Figure S2. The process of making fodder contained MPs**

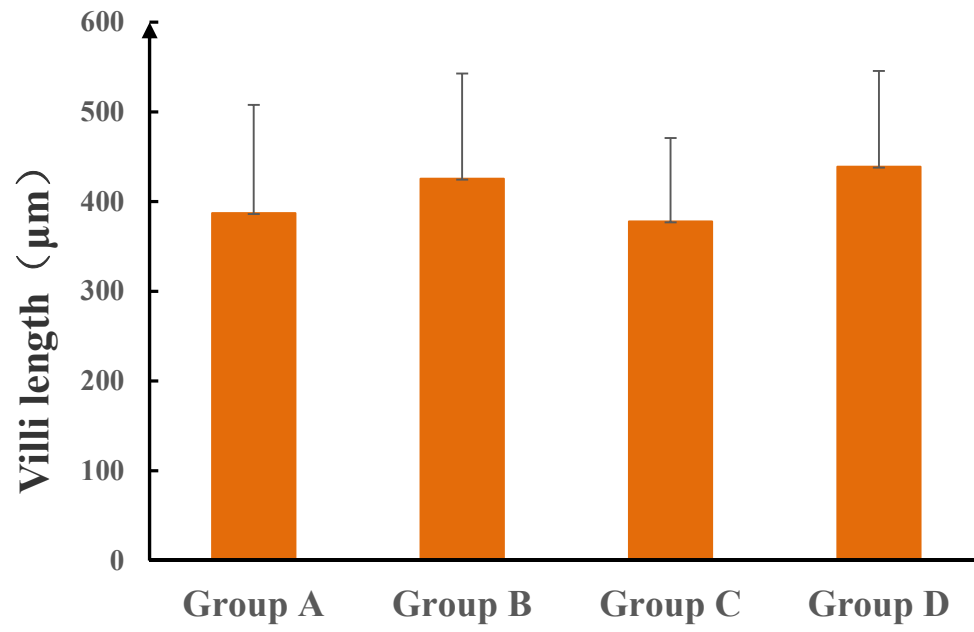

**Figure S3. Villi length of largemouth bass among each group after the trial**

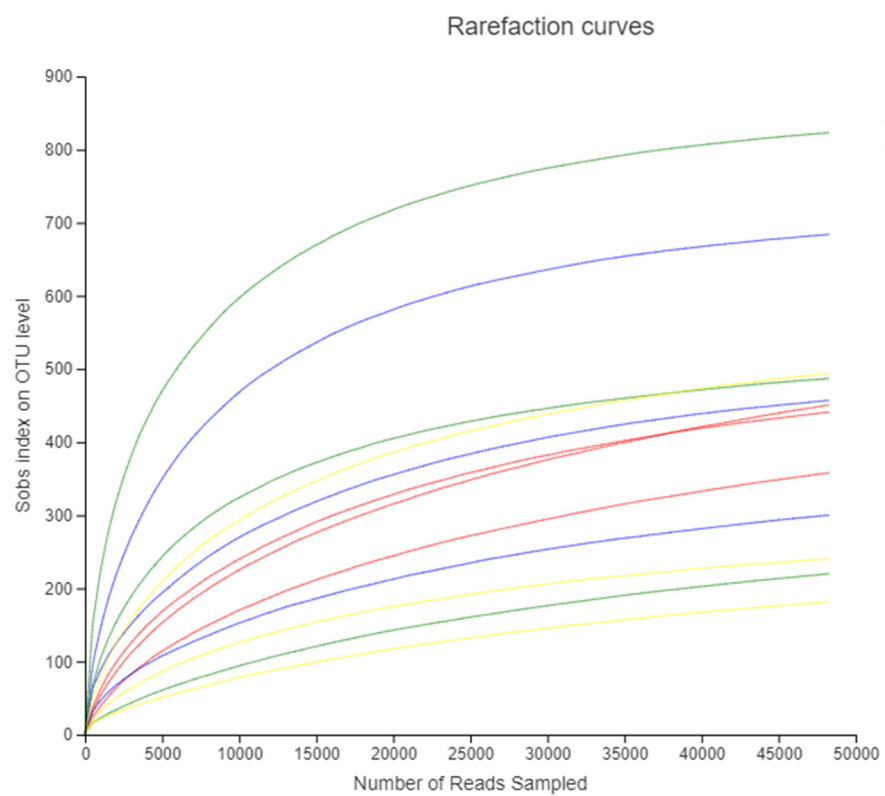

**Figure S4. Rarefaction curves**

### **Supporting Text 1. Specific steps of PCR reactions**

The final DNA concentration and purification were determined by NanoDrop 2000 UV-vis spectrophotometer (Thermo Scientific, Wilmington, USA), and DNA quality was checked by 1% agarose gel electrophoresis. The PCR reactions were conducted using the following program: 3 min of denaturation at 95 °C, 27 cycles of 30 s at 95 °C, 30s for annealing at 55 °C, and 45 s for elongation at 72 °C, and a final extension at 72 °C for 10 min. PCR reactions were performed in triplicate 20 µL mixture containing 4 µL of 5 × FastPfu Buffer, 2 µL of 2.5 mM dNTPs, 0.8 µL of each primer (5 µM), 0.4 µL of FastPfu Polymerase and 10 ng of template DNA. The resulted PCR products were extracted from a 2% agarose gel and further purified using the AxyPrep DNA Gel Extraction Kit (Axygen Biosciences, Union City, CA, USA) and quantified using QuantiFluor™-ST (Promega, USA) according to the manufacturer's protocol.

## **Supporting Text 2: Processing of raw fastq files**

Raw fastq files were demultiplexed, quality-filtered by Trimmomatic and merged by FLASH with the following criteria: (i) The reads were truncated at any site receiving an average quality score  $<20$  over a 50 bp sliding window. (ii) Primers were exactly matched allowing 2 nucleotide mismatching, and reads containing ambiguous bases were removed. (iii) Sequences whose overlap longer than 10 bp were merged according to their overlap sequence.

### **Supporting Text 3: Intestinal microbial analyses**

For intestinal microbial analyses, operational taxonomic units (OTUs) were clustered with 97% similarity cutoff using UPARSE (version 7.1 <http://drive5.com/uparse/>) and chimeric sequences were identified and removed using UCHIME. The taxonomy of each 16S rRNA gene sequence was analyzed by RDP Classifier algorithm (<http://rdp.cme.msu.edu/>) against the Silva (<http://www.arb-silva.de>) database using confidence threshold of 70%. Alpha diversity analyses were calculated using the Mothur software. Co-occurrence network analysis were calculated using Networkx software. Other analyses of intestinal microbiota were conducted using the R package.
